# Supplementary material for: Antimicrobial Peptides Can Generate Tolerance by Lag and Interfere with Antimicrobial Therapy
Source: MDPI journal article supplement (doi:10.3390/pharmaceutics14102169), 2022-10-11
Supplement: s1 [file s1]

Supplementary Materials

# Antimicrobial Peptides Can Generate Tolerance by Lag and Interfere with Antimicrobial Therapy

Daniel Sandín, Javier Valle, Jordi Morata, David Andreu and Marc Torrent

**Table S1.** MICs in *E. coli* wild type and PolB resistant strain. MIC values are in  $\mu$ M.

| Peptide/Strain | <i>E. coli</i> wt | PolB  |
|----------------|-------------------|-------|
| Pleurocidin    | 0.06              | 0.06  |
| Polymyxin B    | 0.01              | > 0.2 |
| Dermaseptin    | 2                 | 2     |
| LL-37          | 3                 | 3     |

**Table S2.** MICs in *E. coli* wild type and evolved. MIC values are in  $\mu$ M.

| Antibiotic     | <i>E. coli</i> wt | PolB | Pleu | LL-37 | DMS |
|----------------|-------------------|------|------|-------|-----|
| Ampicillin     | 17                | 17   | 17   | 17    | 17  |
| Kanamycin      | 1.4               | 1.4  | 1.4  | 1.4   | 2.8 |
| Ciprofloxacin  | 42                | 42   | 42   | 42    | 42  |
| Nalidixic Acid | 11                | 11   | 11   | 11    | 11  |

**Table S3.** Summary of relevant mutations in Pleu and LL-37 evolved strains.

| Gene                        | Treatment | Position                                                       | Reference Sequence                                                                                                       | Mutation                    | Reference<br>(Sequencing<br>Bioproject) |
|-----------------------------|-----------|----------------------------------------------------------------|--------------------------------------------------------------------------------------------------------------------------|-----------------------------|-----------------------------------------|
| yejK-yejL<br>(b2186 -b2187) | Pleu      | 2284069                                                        | GA                                                                                                                       | G                           | --                                      |
|                             |           | 66527                                                          | C                                                                                                                        | A                           | --                                      |
| araD<br>(b0061)             |           | 66530                                                          | G                                                                                                                        | GCGACCGAGAC                 | --                                      |
|                             |           |                                                                |                                                                                                                          | C /<br>GCGCCCGAGAC<br>CCGCA |                                         |
| gltP<br>(b4077)             |           | 4296267                                                        | GCATCCGACATCAACGCCTGATGCGACGC<br>TTAACGCGTCTTATCAGGCCTACGCCAGA<br>CAGCGCAATAGCCTGATTAGCGTGATTTT<br>GTAGGTCGGATAAGGCGTTTA | G                           | PRJNA476486                             |
|                             |           | 4296272                                                        | ATGC                                                                                                                     | A                           | --                                      |
|                             |           | 4296060                                                        | C                                                                                                                        | T                           | PRJNA747892                             |
| mlaC<br>(b3192)             |           | 3337787                                                        | CG                                                                                                                       | C                           | --                                      |
| mlaF<br>(b3195)             |           | 3339509                                                        | A                                                                                                                        | C                           | --                                      |
| rhaD<br>(b3902)             |           | 4093986                                                        | T                                                                                                                        | G                           | --                                      |
|                             |           | 4093989                                                        | A                                                                                                                        | ACGCATGCGGAT                | --                                      |
|                             |           |                                                                |                                                                                                                          | C                           |                                         |
| sspA<br>(b3229)             |           | 3377363                                                        | T                                                                                                                        | TG                          | --                                      |
| glcE<br>(b4468)             |           | 3125885                                                        | A                                                                                                                        | G                           | --                                      |
| hcr-hcp<br>(b0872-b0873)    |           | 912151                                                         | C                                                                                                                        | T                           | --                                      |
|                             | 66535     | T                                                              | A                                                                                                                        | --                          |                                         |
| araD<br>(b0061)             | 66540     | T                                                              | G                                                                                                                        | --                          |                                         |
|                             | 66541     | C                                                              | T                                                                                                                        | --                          |                                         |
| gltP<br>(b4077)             | 4296267   | GCATCCGACATCAACGCCTGATGCGACGC<br>TTAACGCGTCTTATCAGGCCTACGCCAGA | G                                                                                                                        | PRJNA476486                 |                                         |

|                                       |         |                                                                                                                                                                   |                           |             |
|---------------------------------------|---------|-------------------------------------------------------------------------------------------------------------------------------------------------------------------|---------------------------|-------------|
|                                       |         | CAGCGCAATAGCCTGATTTAGCGTGATTTT<br>GTAGGTCGGATAAAGGCGTTTA                                                                                                          |                           |             |
|                                       | 4296272 | ATGC                                                                                                                                                              | A                         | --          |
|                                       |         | CCGCGTCTTATCAGGCCTACGCCAGACAG                                                                                                                                     |                           |             |
|                                       | 4296078 | CGCAATAGCCTGATTTAGCGTGATTTTGTA<br>GGTCGGATAAAGGCGTTTATGCCGCATCCG<br>ACATCAACGCCTGATGCGACGCTTAA<br>GGGGTGATTAGCTCAGCTGGGAGAGCACC<br>TCCCTTACAAGGAGGGGGTCGGCGGTTTCG | C                         | PRJNA663118 |
| <b>valU<br/>(b2401)</b>               | 2520930 | ATCCCGTCATCACCCACCAACTACTTTATG<br>TAGTCTCCGCCGTGTAGCAAGAAATTGAG                                                                                                   | G                         | PRJNA758726 |
|                                       |         | AAGT                                                                                                                                                              |                           |             |
| <b>mhpC<br/>(b0349)</b>               | 371761  | G                                                                                                                                                                 | GTAGATTT                  |             |
|                                       | 371760  | G                                                                                                                                                                 | T                         |             |
|                                       |         |                                                                                                                                                                   | AGTCATACTTTT              |             |
| <b>flhD – insB1<br/>(b1892-b1893)</b> | 1978507 | A                                                                                                                                                                 | GTTTT                     |             |
|                                       | 1978503 | G                                                                                                                                                                 | T                         |             |
|                                       | 1978504 | G                                                                                                                                                                 | A                         |             |
|                                       | 1299499 | G                                                                                                                                                                 | A                         |             |
| <b>ychE<br/>(b1242)</b>               | 1299500 | G                                                                                                                                                                 | T                         |             |
|                                       | 1299502 | A                                                                                                                                                                 | ATAATCAATTGT<br>TAAATTATT |             |
| <b>emrY<br/>(b2367)</b>               | 2481016 | T                                                                                                                                                                 | G                         |             |
